# Supplementary material
Source: PubMed Central journal article supplement (PMC1347367)
Supplement: nar_34_suppl-1_D218__1.pdf [file nar_34_suppl-1_D218__1.pdf]

| <b>Cellular Component</b> |                                           | <b>A</b> | <b>B</b> |
|---------------------------|-------------------------------------------|----------|----------|
| GO:0000172                | ribonuclease MRP complex                  | 2        | 1        |
| GO:0005655                | nucleolar ribonuclease P complex          | 5        | 3        |
| GO:0030530                | heterogeneous nuclear ribonucleoprotein   | 10       | 7        |
| GO:0000178                | exosome (RNase complex)                   | 6        | 8        |
| GO:0005663                | DNA replication factor C complex          | 5        | 17       |
| GO:0000786                | nucleosome                                | 19       | 101      |
| GO:0005732                | small nucleolar ribonucleoprotein complex | 6        | 37       |
| GO:0005694                | chromosome                                | 18       | 118      |
| GO:0005730                | nucleolus                                 | 18       | 122      |
| GO:0005842                | cytosolic large ribosomal subunit (sensu  | 14       | 95       |
| GO:0005840                | ribosome                                  | 42       | 302      |
| GO:0005654                | nucleoplasm                               | 10       | 74       |
| GO:0005843                | cytosolic small ribosomal subunit (sensu  | 10       | 91       |
| GO:0000785                | chromatin                                 | 11       | 103      |
| GO:0030529                | ribonucleoprotein complex                 | 10       | 113      |
| GO:0005681                | spliceosome complex                       | 14       | 191      |

| <b>Molecular Function</b> |                                     | <b>A</b> | <b>B</b> |
|---------------------------|-------------------------------------|----------|----------|
| GO:0004526                | ribonuclease P activity             | 6        | 6        |
| GO:0000175                | 3'-5'-exoribonuclease activity      | 9        | 17       |
| GO:0008408                | 3'-5' exonuclease activity          | 8        | 19       |
| GO:0004527                | exonuclease activity                | 14       | 34       |
| GO:0003690                | double-stranded DNA binding         | 6        | 33       |
| GO:0004004                | ATP-dependent RNA helicase activity | 10       | 58       |
| GO:0008026                | ATP-dependent helicase activity     | 24       | 142      |
| GO:0004003                | ATP-dependent DNA helicase activity | 6        | 36       |
| GO:0008094                | DNA-dependent ATPase activity       | 6        | 39       |
| GO:0003723                | RNA binding                         | 101      | 868      |
| GO:0003725                | double-stranded RNA binding         | 8        | 64       |
| GO:0003697                | single-stranded DNA binding         | 7        | 58       |
| GO:0003735                | structural constituent of ribosome  | 50       | 594      |
| GO:0008248                | pre-mRNA splicing factor activity   | 18       | 220      |

| <b>Biological Process</b> |                                        | <b>A</b> | <b>B</b> |
|---------------------------|----------------------------------------|----------|----------|
| GO:0006337                | nucleosome disassembly                 | 2        | 1        |
| GO:0006364                | rRNA processing                        | 22       | 34       |
| GO:0008380                | RNA splicing                           | 21       | 51       |
| GO:0007052                | mitotic spindle assembly               | 5        | 19       |
| GO:0008033                | tRNA processing                        | 7        | 33       |
| GO:0006396                | RNA processing                         | 15       | 80       |
| GO:0006334                | nucleosome assembly                    | 20       | 108      |
| GO:0007001                | chromosome organization and biogenesis | 21       | 140      |
| GO:0006270                | DNA replication initiation             | 6        | 40       |

|            |                      |    |     |
|------------|----------------------|----|-----|
| GO:0006397 | mRNA processing      | 13 | 142 |
| GO:0006260 | DNA replication      | 16 | 222 |
| GO:0006412 | protein biosynthesis | 60 | 884 |

*Note the values A, B, C and D are denoted from the following table*

|                                             |                  |                      |
|---------------------------------------------|------------------|----------------------|
| 2x2 Contingency Table                       | <b>Nucleolar</b> | <b>Non-Nucleolar</b> |
| <b>Presence of a specific GO annotation</b> | A                | B                    |
| <b>Absence of a specific GO annotation</b>  | C                | D                    |

*Go to the following website to know more about the GO annotation*

<http://www.godatabase.org/cgi-bin/amigo/go.cgi?>

Statistics:

If the frequency of any cell is less than 5, Fisher exact test was employed showing two P

| C   | D     | Odd ratio   | P value (Fisher tes | Chi square tes  |
|-----|-------|-------------|---------------------|-----------------|
| 659 | 18673 | 56.6707132  | 0.00342151          |                 |
| 656 | 18671 | 47.43648374 | 2.36E-06            |                 |
| 651 | 18667 | 40.96335308 | 3.19E-11            | p<0.001 (chisq= |
| 655 | 18666 | 21.37328244 |                     | p<0.001 (chisq= |
| 656 | 18657 | 8.364867288 |                     | p<0.001 (chisq= |
| 642 | 18573 | 5.442259647 |                     | p<0.001 (chisq= |
| 655 | 18637 | 4.614070559 |                     | p<0.001 (chisq= |
| 643 | 18556 | 4.402140391 |                     | p<0.001 (chisq= |
| 643 | 18552 | 4.25689009  |                     | p<0.001 (chisq= |
| 647 | 18579 | 4.23177418  |                     | p<0.001 (chisq= |
| 619 | 18372 | 4.127700093 |                     | p<0.001 (chisq= |
| 651 | 18600 | 3.861003861 |                     | p<0.001 (chisq= |
| 651 | 18583 | 3.136847791 |                     | p<0.001 (chisq= |
| 650 | 18571 | 3.051247199 |                     | p<0.001 (chisq= |
| 651 | 18561 | 2.523143428 |                     | p<0.01 (chisq=  |
| 647 | 18483 | 2.093933337 |                     | p<0.025 (chisq= |

| C   | D     | Odd ratio   | P value (Fisher tes | Chi square tes  |
|-----|-------|-------------|---------------------|-----------------|
| 655 | 18668 | 28.50076336 |                     | p<0.001 (chisq= |
| 652 | 18657 | 15.14913389 |                     | p<0.001 (chisq= |
| 653 | 18655 | 12.02869348 |                     | p<0.001 (chisq= |
| 647 | 18640 | 11.86289663 |                     | p<0.001 (chisq= |
| 655 | 18641 | 5.174462179 |                     | p<0.001 (chisq= |
| 651 | 18616 | 4.930345887 |                     | p<0.001 (chisq= |
| 637 | 18532 | 4.917062816 |                     | p<0.001 (chisq= |
| 655 | 18638 | 4.742493639 |                     | p<0.001 (chisq= |
| 655 | 18635 | 4.376981797 |                     | p<0.005 (chisq= |
| 560 | 17806 | 3.699814845 |                     | p<0.001 (chisq= |
| 653 | 18610 | 3.562404288 |                     | p<0.005 (chisq= |
| 654 | 18616 | 3.435410735 |                     | p<0.005 (chisq= |
| 611 | 18080 | 2.490811001 |                     | p<0.001 (chisq= |
| 643 | 18454 | 2.348169094 |                     | p<0.001 (chisq= |

| C   | D     | Odd ratio   | P value (Fisher tes | Chi square tes  |
|-----|-------|-------------|---------------------|-----------------|
| 659 | 18673 | 56.6707132  | 0.00342151          |                 |
| 639 | 18640 | 18.87508055 |                     | p<0.001 (chisq= |
| 640 | 18623 | 11.98170956 |                     | p<0.001 (chisq= |
| 656 | 18655 | 7.483552632 |                     | p<0.001 (chisq= |
| 654 | 18641 | 6.046103234 |                     | p<0.001 (chisq= |
| 646 | 18594 | 5.396865325 |                     | p<0.001 (chisq= |
| 641 | 18566 | 5.36372566  |                     | p<0.001 (chisq= |
| 640 | 18534 | 4.34390625  |                     | p<0.001 (chisq= |
| 655 | 18634 | 4.267328244 |                     | p<0.005 (chisq= |

|     |       |             |                 |
|-----|-------|-------------|-----------------|
| 648 | 18532 | 2.618196835 | p<0.005 (chisq= |
| 645 | 18452 | 2.061819959 | p<0.01 (chisq=  |
| 601 | 17790 | 2.009094947 | p<0.001 (chisq= |

**proteome**

-tail value; otherwise, chi-square test with Yates' correction value was employed to ca

**t**

=141.839767608565)  
=54.5862561714679)  
=19.3595619984588)  
=52.6443767120455)  
=11.4644168231828)  
=37.0359535070412)  
=35.2234971517161)  
=26.6926529581422)  
=79.2798319572109)  
=15.9099060002094)  
=11.023084424452)  
=11.6508611351848)  
6.94790195799473)  
=6.29281685846839)

**t**

=65.4232989103424)  
=67.5710462907459)  
=48.5895542039732)  
=88.9583501590083)  
=13.5098372078082)  
=23.0118375220793)  
=58.4716786292768)  
=11.9367440975216)  
=10.5874119519454)  
=149.35788692634)  
=10.7188859449335)  
=8.55564165880012)  
=36.7474837019077)  
=11.2962404701779)

**t**

=208.061860717325)  
=137.385494530989)  
=17.1064467979457)  
=19.9872119615504)  
=40.5643732993688)  
=54.4832954769041)  
=42.6581979026777)  
=10.1797935386853)

=10.2142457808925)  
6.98598551968528)  
=25.0057456263428)

with Yates' correction value was

| <b>Cellular Component</b>               | <b>A</b> | <b>B</b> | <b>C</b> |     |
|-----------------------------------------|----------|----------|----------|-----|
| GO:0005737 cytoplasm                    |          | 28       | 1563     | 633 |
| GO:0005667 transcription factor complex |          | 4        | 428      | 657 |
| GO:0005856 cytoskeleton                 |          | 4        | 514      | 657 |
| GO:0005624 membrane fraction            |          | 4        | 537      | 657 |
| GO:0005739 mitochondrion                |          | 11       | 1578     | 650 |
| GO:0005871 kinesin complex              |          | 1        | 174      | 660 |
| GO:0005743 mitochondrial inner membrane |          | 1        | 188      | 660 |
| GO:0008372 cellular_component unknown   |          | 10       | 1875     | 651 |
| GO:0005625 soluble fraction             |          | 1        | 205      | 660 |
| GO:0005783 endoplasmic reticulum        |          | 3        | 682      | 658 |
| GO:0005886 plasma membrane              |          | 2        | 1065     | 659 |
| GO:0016020 membrane                     |          | 6        | 3201     | 655 |
| GO:0005829 cytosol                      |          | 1        | 631      | 660 |
| GO:0005887 integral to plasma membrane  |          | 2        | 1886     | 659 |
| GO:0016021 integral to membrane         |          | 4        | 6392     | 657 |

| <b>Molecular Function</b>                           | <b>A</b> | <b>B</b> | <b>C</b> |     |
|-----------------------------------------------------|----------|----------|----------|-----|
| GO:0003677 DNA binding                              |          | 77       | 2940     | 584 |
| GO:0003676 nucleic acid binding                     |          | 33       | 1601     | 628 |
| GO:0005200 structural constituent of cytoskeleton   |          | 8        | 488      | 653 |
| GO:0004871 signal transducer activity               |          | 7        | 542      | 654 |
| GO:0005198 structural molecule activity             |          | 8        | 618      | 653 |
| GO:0008270 zinc ion binding                         |          | 18       | 1416     | 643 |
| GO:0004674 protein serine/threonine kinase activity |          | 13       | 1077     | 648 |
| GO:0016740 transferase activity                     |          | 27       | 2213     | 634 |
| GO:0008565 protein transporter activity             |          | 5        | 525      | 656 |
| GO:0003774 motor activity                           |          | 2        | 218      | 659 |
| GO:0004867 serine-type endopeptidase inhibitor ac   |          | 2        | 248      | 659 |
| GO:0005554 molecular_function unknown               |          | 13       | 1728     | 648 |
| GO:0005516 calmodulin binding                       |          | 2        | 301      | 659 |
| GO:0016874 ligase activity                          |          | 2        | 344      | 659 |
| GO:0003779 actin binding                            |          | 3        | 518      | 658 |
| GO:0016563 transcriptional activator activity       |          | 1        | 182      | 660 |
| GO:0004842 ubiquitin-protein ligase activity        |          | 1        | 192      | 660 |
| GO:0005488 binding                                  |          | 1        | 199      | 660 |
| GO:0004725 protein tyrosine phosphatase activity    |          | 1        | 201      | 660 |
| GO:0005515 protein binding                          |          | 16       | 2838     | 645 |
| GO:0016491 oxidoreductase activity                  |          | 6        | 1212     | 655 |
| GO:0003700 transcription factor activity            |          | 12       | 2388     | 649 |
| GO:0005215 transporter activity                     |          | 3        | 707      | 658 |
| GO:0004888 transmembrane receptor activity          |          | 1        | 252      | 660 |
| GO:0016829 lyase activity                           |          | 1        | 256      | 660 |
| GO:0030528 transcription regulator activity         |          | 1        | 301      | 660 |
| GO:0000287 magnesium ion binding                    |          | 1        | 335      | 660 |
| GO:0008233 peptidase activity                       |          | 1        | 413      | 660 |
| GO:0005509 calcium ion binding                      |          | 3        | 1331     | 658 |
| GO:0016301 kinase activity                          |          | 1        | 744      | 660 |

|            |                                  |   |      |     |
|------------|----------------------------------|---|------|-----|
| GO:0001584 | rhodopsin-like receptor activity | 1 | 810  | 660 |
| GO:0004672 | protein kinase activity          | 1 | 814  | 660 |
| GO:0004872 | receptor activity                | 1 | 3268 | 660 |

| <b>Biological Process</b> | <b>A</b>                                                       | <b>B</b> | <b>C</b> |     |
|---------------------------|----------------------------------------------------------------|----------|----------|-----|
| GO:0008283                | cell proliferation                                             | 9        | 569      | 652 |
| GO:0006357                | regulation of transcription from Pol II promoter               | 11       | 702      | 650 |
| GO:0006355                | regulation of transcription, DNA-dependent                     | 45       | 3341     | 616 |
| GO:0007283                | spermatogenesis                                                | 3        | 301      | 658 |
| GO:0008151                | cell growth and/or maintenance                                 | 5        | 500      | 656 |
| GO:0006366                | transcription from Pol II promoter                             | 4        | 404      | 657 |
| GO:0006468                | protein amino acid phosphorylation                             | 14       | 1471     | 647 |
| GO:0006605                | protein targeting                                              | 2        | 261      | 659 |
| GO:0006955                | immune response                                                | 5        | 696      | 656 |
| GO:0006915                | apoptosis                                                      | 4        | 574      | 657 |
| GO:0007166                | cell surface receptor linked signal transduction               | 2        | 300      | 659 |
| GO:0000004                | biological_process unknown                                     | 12       | 1700     | 649 |
| GO:0006520                | amino acid metabolism                                          | 1        | 160      | 660 |
| GO:0006950                | response to stress                                             | 1        | 164      | 660 |
| GO:0007165                | signal transduction                                            | 11       | 1691     | 650 |
| GO:0006512                | ubiquitin cycle                                                | 1        | 171      | 660 |
| GO:0007169                | transmembrane receptor protein tyrosine phosphorylation        | 1        | 175      | 660 |
| GO:0006886                | intracellular protein transport                                | 5        | 875      | 656 |
| GO:0006810                | transport                                                      | 10       | 1708     | 651 |
| GO:0030154                | cell differentiation                                           | 1        | 187      | 660 |
| GO:0007275                | development                                                    | 6        | 1101     | 655 |
| GO:0006470                | protein amino acid dephosphorylation                           | 2        | 381      | 659 |
| GO:0007264                | small GTPase mediated signal transduction                      | 2        | 384      | 659 |
| GO:0007517                | muscle development                                             | 1        | 215      | 660 |
| GO:0006917                | induction of apoptosis                                         | 1        | 228      | 660 |
| GO:0006464                | protein modification                                           | 1        | 254      | 660 |
| GO:0006954                | inflammatory response                                          | 1        | 265      | 660 |
| GO:0007601                | visual perception                                              | 1        | 293      | 660 |
| GO:0006139                | nucleobase, nucleoside, nucleotide and nucleic acid metabolism | 1        | 303      | 660 |
| GO:0006508                | proteolysis and peptidolysis                                   | 5        | 1455     | 656 |
| GO:0006118                | electron transport                                             | 2        | 709      | 659 |
| GO:0007242                | intracellular signaling cascade                                | 2        | 946      | 659 |
| GO:0007186                | G-protein coupled receptor protein signaling                   | 3        | 1561     | 658 |
| GO:0007399                | neurogenesis                                                   | 1        | 600      | 660 |
| GO:0008152                | metabolism                                                     | 1        | 761      | 660 |
| GO:0006952                | defense response                                               | 1        | 797      | 660 |
| GO:0007155                | cell adhesion                                                  | 1        | 1010     | 660 |

Note the values A, B, C and D are denoted from the following table

|                                             |                  |                               |
|---------------------------------------------|------------------|-------------------------------|
| 2x2 Contingency Table                       | <b>Nucleolar</b> | <b>Non-Nucleolar proteome</b> |
| <b>Presence of a specific GO annotation</b> | A                | B                             |



**Absence of a specific GO annotation** C D

*Go to the following website to know more about the GO annotation*

<http://www.godatabase.org/cgi-bin/amigo/go.cgi?>

Statistics:

If the frequency of any cell is less than 5, Fisher exact test was employed showing two P-tail v

| <b>D</b> | <b>Odd ratio</b> | <b>P value (Fisher test Chi square test)</b> |
|----------|------------------|----------------------------------------------|
| 17111    | 0.48425123       | 5.04E-05 p<0.001 (chisq=13.9050135805036)    |
| 18246    | 0.2595485        | 0.001777935                                  |
| 18160    | 0.21510344       | 0.000182907                                  |
| 18137    | 0.20562967       | 9.27E-05                                     |
| 17096    | 0.18334406       | 2.03E-13 p<0.001 (chisq=38.0817597911428)    |
| 18500    | 0.1610937        | 0.033360252                                  |
| 18486    | 0.14898453       | 0.023778027                                  |
| 16799    | 0.13762622       | 2.34E-18 p<0.001 (chisq=51.8012366430226)    |
| 18469    | 0.13650407       | 0.011151904                                  |
| 17992    | 0.12027917       | 1.54E-07                                     |
| 17609    | 0.05017989       | 5.19E-14                                     |
| 15473    | 0.0442791        | 1.49E-43 p<0.001 (chisq=120.431838323261)    |
| 18043    | 0.04332469       | 9.46E-09                                     |
| 16788    | 0.02701481       | 4.95E-27                                     |
| 12282    | 0.01169841       | 1.19E-109                                    |

| <b>D</b> | <b>Odd ratio</b> | <b>P value (Fisher test Chi square test)</b> |
|----------|------------------|----------------------------------------------|
| 15734    | 0.70561807       | 0.003797866 p<0.01 (chisq=7.82044550169752)  |
| 17073    | 0.56036733       | 0.00078188 p<0.005 (chisq=10.1234711207644)  |
| 18186    | 0.45655612       | 0.023219349 p<0.05 (chisq=4.48173845760007)  |
| 18132    | 0.35806899       | 0.002665081 p<0.01 (chisq=7.20973795547642)  |
| 18056    | 0.35793971       | 0.00110779 p<0.005 (chisq=8.32161131014681)  |
| 17258    | 0.34118407       | 2.10E-07 p<0.001 (chisq=21.2541011739509)    |
| 17597    | 0.32778666       | 4.24E-06 p<0.001 (chisq=16.6281751953267)    |
| 16461    | 0.31677384       | 8.70E-12 p<0.001 (chisq=36.8344597458628)    |
| 18149    | 0.26348722       | 0.000384946 p<0.005 (chisq=9.35602361347948) |
| 18456    | 0.25693642       | 0.037434811                                  |
| 18426    | 0.22548828       | 0.013591381                                  |
| 16946    | 0.19673961       | 4.95E-14 p<0.001 (chisq=40.4860883763202)    |
| 18373    | 0.18524998       | 0.003536166                                  |
| 18330    | 0.16171437       | 0.000862377                                  |
| 18156    | 0.15980331       | 2.42E-05                                     |
| 18492    | 0.15394605       | 0.022932551                                  |
| 18482    | 0.14584912       | 0.01596362                                   |
| 18475    | 0.14066545       | 0.016517286                                  |
| 18473    | 0.13925072       | 0.016847765                                  |
| 15836    | 0.13841826       | 2.44E-27 p<0.001 (chisq=81.8209221717114)    |
| 17462    | 0.13197793       | 2.58E-12 p<0.001 (chisq=32.7679357208821)    |
| 16286    | 0.12610046       | 4.84E-24 p<0.001 (chisq=69.6895730212998)    |
| 17967    | 0.1158648        | 7.39E-08                                     |
| 18422    | 0.11076239       | 0.002602275                                  |
| 18418    | 0.10900805       | 0.002667106                                  |
| 18373    | 0.09248465       | 0.000605351                                  |
| 18339    | 0.08294437       | 0.000197652                                  |
| 18261    | 0.06699318       | 1.40E-05                                     |
| 17343    | 0.05940753       | 5.20E-17                                     |
| 17930    | 0.03651434       | 1.84E-10                                     |

|       |            |          |
|-------|------------|----------|
| 17864 | 0.03341564 | 1.67E-11 |
| 17860 | 0.03324399 | 1.73E-11 |
| 15406 | 0.00714272 | 1.90E-52 |

| <b>D</b> | <b>Odd ratio</b> | <b>P value (Fisher test Chi square test)</b> |
|----------|------------------|----------------------------------------------|
| 18105    | 0.43921906       | 0.009974976 p<0.025 (chisq=5.68578213253599) |
| 17972    | 0.43325005       | 0.003070525 p<0.01 (chisq=7.31106466688527)  |
| 15333    | 0.33526056       | 4.66E-16 p<0.001 (chisq=53.5232571391568)    |
| 18373    | 0.27829727       | 0.01542559                                   |
| 18174    | 0.27704268       | 0.000729065 p<0.005 (chisq=8.52281929660586) |
| 18270    | 0.2753289        | 0.003363742                                  |
| 17203    | 0.2530552        | 3.91E-10 p<0.001 (chisq=29.0575214633627)    |
| 18413    | 0.2141059        | 0.009703094                                  |
| 17978    | 0.1968785        | 3.66E-06 p<0.001 (chisq=15.2849032929198)    |
| 18100    | 0.19198235       | 2.25E-05                                     |
| 18374    | 0.18587759       | 0.003516086                                  |
| 16974    | 0.18461706       | 2.83E-14 p<0.001 (chisq=41.1194794100949)    |
| 18514    | 0.17532197       | 0.047025449                                  |
| 18510    | 0.17100887       | 0.048181982                                  |
| 16983    | 0.16996133       | 7.32E-15 p<0.001 (chisq=42.5282131700934)    |
| 18503    | 0.16394648       | 0.032860586                                  |
| 18499    | 0.1601645        | 0.033597898                                  |
| 17799    | 0.15504355       | 1.87E-08 p<0.001 (chisq=21.7927881066519)    |
| 16966    | 0.15258457       | 5.46E-16 p<0.001 (chisq=45.0114402113164)    |
| 18487    | 0.14978934       | 0.023571651                                  |
| 17573    | 0.14620713       | 1.14E-10 p<0.001 (chisq=28.5124749150181)    |
| 18293    | 0.14571509       | 0.000300045                                  |
| 18290    | 0.14455298       | 0.000306101                                  |
| 18459    | 0.13008457       | 0.007744324                                  |
| 18446    | 0.12258107       | 0.005392887                                  |
| 18420    | 0.10987831       | 0.002627452                                  |
| 18409    | 0.10525443       | 0.001814322                                  |
| 18381    | 0.09505119       | 0.000908548                                  |
| 18371    | 0.09186419       | 0.00061686                                   |
| 17219    | 0.09020095       | 9.22E-17 p<0.001 (chisq=44.259559104058)     |
| 17965    | 0.07689986       | 9.85E-09                                     |
| 17728    | 0.05687392       | 2.66E-12                                     |
| 17113    | 0.04998257       | 1.33E-20                                     |
| 18074    | 0.04564141       | 3.16E-08                                     |
| 17913    | 0.0356648        | 8.17E-11                                     |
| 17877    | 0.0339854        | 2.47E-11                                     |
| 17664    | 0.02649865       | 1.89E-14                                     |

value; otherwise, chi-square test with Yates' correction value was employed to calculate the





p-value.
