# Supplementary material
Source: PubMed Central journal article supplement (PMC1347367)
Supplement: nar_34_suppl-1_D218__2.pdf [file nar_34_suppl-1_D218__2.pdf]

| <b>Interpro ID</b> | <b>Motif Name</b>                             | <b>A</b> | <b>B</b> |
|--------------------|-----------------------------------------------|----------|----------|
| IPR000504          | RNA-binding region RNP-1 (RNA recognition r   | 49       | 246      |
| IPR001650          | Helicase, C-terminal                          | 39       | 98       |
| IPR001410          | DEAD/DEAH box helicase                        | 39       | 100      |
| IPR001680          | G-protein beta WD-40 repeat                   | 36       | 330      |
| IPR008938          | ARM repeat fold                               | 24       | 365      |
| IPR007124          | Histone-fold/TFIID-TAF/NF-Y                   | 15       | 53       |
| IPR000629          | ATP-dependent helicase, DEAD-box              | 14       | 17       |
| IPR009072          | Histone-fold                                  | 13       | 71       |
| IPR007125          | Histone core                                  | 12       | 36       |
| IPR003593          | AAA ATPase                                    | 9        | 141      |
| IPR001159          | Double-stranded RNA binding (DsRBD) domain    | 8        | 23       |
| IPR008994          | Nucleic acid-binding OB-fold                  | 8        | 82       |
| IPR000795          | Protein synthesis factor, GTP-binding         | 7        | 15       |
| IPR009000          | Translation factor                            | 7        | 16       |
| IPR004038          | Ribosomal protein L7Ae/L30e/S12e/Gadd45       | 6        | 7        |
| IPR005818          | Histone H1/H5                                 | 6        | 10       |
| IPR005824          | KOW                                           | 6        | 10       |
| IPR000558          | Histone H2B                                   | 6        | 13       |
| IPR002464          | ATP-dependent helicase, DEAH-box              | 6        | 13       |
| IPR004161          | Elongation factor Tu, domain 2                | 6        | 15       |
| IPR002119          | Histone H2A                                   | 6        | 16       |
| IPR000953          | Chromo                                        | 6        | 30       |
| IPR001878          | Zn-finger, CCHC type                          | 6        | 46       |
| IPR003439          | ABC transporter                               | 6        | 70       |
| IPR007109          | Brix domain                                   | 5        | 1        |
| IPR005819          | Histone H5                                    | 5        | 4        |
| IPR001247          | 3' exoribonuclease                            | 5        | 5        |
| IPR001208          | MCM                                           | 5        | 7        |
| IPR003034          | DNA-binding SAP                               | 5        | 24       |
| IPR000330          | SNF2 related domain                           | 5        | 42       |
| IPR004087          | KH                                            | 5        | 42       |
| IPR003395          | SMC protein, N-terminal                       | 4        | 3        |
| IPR004037          | Ribosomal protein L7AE                        | 3        | 1        |
| IPR008251          | Chromo shadow                                 | 3        | 1        |
| IPR008921          | DNA polymerase III clamp loader subunit, C-t  | 3        | 1        |
| IPR004589          | ATP-dependent DNA helicase RecQ               | 3        | 2        |
| IPR000988          | Ribosomal protein L24E                        | 2        | 1        |
| IPR002121          | HRDC domain                                   | 2        | 1        |
| IPR002415          | High mobility group-like nuclear protein      | 2        | 1        |
| IPR005612          | CBF/Mak21 family                              | 2        | 1        |
| IPR005825          | Ribosomal protein L24/L26                     | 2        | 1        |
| IPR009018          | Signal recognition particle, 9 kDa and 14 kDa | 2        | 1        |

**Absence of a specific IPR motif**

C

D

*Replace the number below with the above IPR id to know more about the motif*  
<http://www.ebi.ac.uk/interpro/DisplayIproEntry?ac=IPRnnnnnn>

Statistics:

If the frequency of any cell is less than 5, Fisher exact test was employed showing two



P-tail value; otherwise, chi-square test with Yates' correction value was employed to calculate th



with Yates' cor

| <b>Interpro ID</b> | <b>Motif Name</b>                             | <b>A</b> | <b>B</b> |
|--------------------|-----------------------------------------------|----------|----------|
| IPR007109          | Brix domain                                   | 5        | 1        |
| IPR004037          | Ribosomal protein L7AE                        | 3        | 1        |
| IPR008251          | Chromo shadow                                 | 3        | 1        |
| IPR008921          | DNA polymerase III clamp loader subunit, C-t  | 3        | 1        |
| IPR000988          | Ribosomal protein L24E                        | 2        | 1        |
| IPR002121          | HRDC domain                                   | 2        | 1        |
| IPR002415          | High mobility group-like nuclear protein      | 2        | 1        |
| IPR005612          | CBF/Mak21 family                              | 2        | 1        |
| IPR005825          | Ribosomal protein L24/L26                     | 2        | 1        |
| IPR009018          | Signal recognition particle, 9 kDa and 14 kDa | 2        | 1        |
| IPR004589          | ATP-dependent DNA helicase RecQ               | 3        | 2        |
| IPR003395          | SMC protein, N-terminal                       | 4        | 3        |
| IPR005819          | Histone H5                                    | 5        | 4        |
| IPR001247          | 3' exoribonuclease                            | 5        | 5        |
| IPR004038          | Ribosomal protein L7Ae/L30e/S12e/Gadd45       | 6        | 7        |
| IPR000629          | ATP-dependent helicase, DEAD-box              | 14       | 17       |
| IPR001208          | MCM                                           | 5        | 7        |
| IPR005818          | Histone H1/H5                                 | 6        | 10       |
| IPR005824          | KOW                                           | 6        | 10       |
| IPR000795          | Protein synthesis factor, GTP-binding         | 7        | 15       |
| IPR000558          | Histone H2B                                   | 6        | 13       |
| IPR002464          | ATP-dependent helicase, DEAH-box              | 6        | 13       |
| IPR009000          | Translation factor                            | 7        | 16       |
| IPR001650          | Helicase, C-terminal                          | 39       | 98       |
| IPR001410          | DEAD/DEAH box helicase                        | 39       | 100      |
| IPR004161          | Elongation factor Tu, domain 2                | 6        | 15       |
| IPR002119          | Histone H2A                                   | 6        | 16       |
| IPR001159          | Double-stranded RNA binding (DsRBD) domain    | 8        | 23       |
| IPR007125          | Histone core                                  | 12       | 36       |
| IPR007124          | Histone-fold/TFIID-TAF/NF-Y                   | 15       | 53       |
| IPR000504          | RNA-binding region RNP-1 (RNA recognition r   | 49       | 246      |
| IPR003034          | DNA-binding SAP                               | 5        | 24       |
| IPR000953          | Chromo                                        | 6        | 30       |
| IPR009072          | Histone-fold                                  | 13       | 71       |
| IPR001878          | Zn-finger, CCHC type                          | 6        | 46       |
| IPR000330          | SNF2 related domain                           | 5        | 42       |
| IPR004087          | KH                                            | 5        | 42       |
| IPR001680          | G-protein beta WD-40 repeat                   | 36       | 330      |
| IPR008994          | Nucleic acid-binding OB-fold                  | 8        | 82       |
| IPR003439          | ABC transporter                               | 6        | 70       |
| IPR008938          | ARM repeat fold                               | 24       | 365      |
| IPR003593          | AAA ATPase                                    | 9        | 141      |

**Absence of a specific IPR motif**

C

D

*Replace the number below with the above IPR id to know more about the motif*  
<http://www.ebi.ac.uk/interpro/DisplayIproEntry?ac=IPRnnnnnn>



| C   | D     | Odd ratio  | P value (Fis) | Chi square test                  |
|-----|-------|------------|---------------|----------------------------------|
| 686 | 28234 | 205.787172 | 4.51E-08      |                                  |
| 688 | 28234 | 123.113372 | 5.33E-05      |                                  |
| 688 | 28234 | 123.113372 | 5.33E-05      |                                  |
| 688 | 28234 | 123.113372 | 5.33E-05      |                                  |
| 689 | 28234 | 81.9564586 | 0.00168242    |                                  |
| 689 | 28234 | 81.9564586 | 0.00168242    |                                  |
| 689 | 28234 | 81.9564586 | 0.00168242    |                                  |
| 689 | 28234 | 81.9564586 | 0.00168242    |                                  |
| 689 | 28234 | 81.9564586 | 0.00168242    |                                  |
| 689 | 28234 | 81.9564586 | 0.00168242    |                                  |
| 688 | 28233 | 61.5545058 | 0.00013095    |                                  |
| 687 | 28232 | 54.792819  | 1.07E-05      |                                  |
| 686 | 28231 | 51.4413265 | 8.92E-07      |                                  |
| 686 | 28230 | 41.1516035 |               | p<0.001 (chisq=77.8946288723723) |
| 685 | 28228 | 35.3217935 |               | p<0.001 (chisq=88.8802533373617) |
| 677 | 28218 | 34.3254844 |               | p<0.001 (chisq=225.465020664709) |
| 686 | 28228 | 29.39192   |               | p<0.001 (chisq=63.469105421065)  |
| 685 | 28225 | 24.7226277 |               | p<0.001 (chisq=70.2417008249432) |
| 685 | 28225 | 24.7226277 |               | p<0.001 (chisq=70.2417008249432) |
| 684 | 28220 | 19.2534113 |               | p<0.001 (chisq=69.6329567548056) |
| 685 | 28222 | 19.0153846 |               | p<0.001 (chisq=57.5118624023301) |
| 685 | 28222 | 19.0153846 |               | p<0.001 (chisq=57.5118624023301) |
| 684 | 28219 | 18.0494335 |               | p<0.001 (chisq=66.0761508970337) |
| 652 | 28137 | 17.1738919 |               | p<0.001 (chisq=390.310401575334) |
| 652 | 28135 | 16.8292178 |               | p<0.001 (chisq=383.678300842524) |
| 685 | 28220 | 16.4788321 |               | p<0.001 (chisq=51.0574040717789) |
| 685 | 28219 | 15.4483577 |               | p<0.001 (chisq=48.2735429971323) |
| 683 | 28212 | 14.3673054 |               | p<0.001 (chisq=63.2758949763662) |
| 679 | 28199 | 13.8433972 |               | p<0.001 (chisq=95.9296239945199) |
| 676 | 28182 | 11.7988724 |               | p<0.001 (chisq=104.799136540015) |
| 642 | 27989 | 8.68387027 |               | p<0.001 (chisq=252.377239999527) |
| 686 | 28211 | 8.56748056 |               | p<0.001 (chisq=21.4569155046897) |
| 685 | 28205 | 8.2350365  |               | p<0.001 (chisq=25.6795585958955) |
| 678 | 28164 | 7.60588309 |               | p<0.001 (chisq=56.3798595012)    |
| 685 | 28189 | 5.36762932 |               | p<0.001 (chisq=14.9781666942395) |
| 686 | 28193 | 4.89257948 |               | p<0.005 (chisq=10.4242004257588) |
| 686 | 28193 | 4.89257948 |               | p<0.005 (chisq=10.4242004257588) |
| 655 | 27905 | 4.64760583 |               | p<0.001 (chisq=84.9626679913749) |
| 683 | 28153 | 4.02142628 |               | p<0.001 (chisq=13.6815214389727) |
| 685 | 28165 | 3.52429614 |               | p<0.01 (chisq=7.6805109946311)   |
| 667 | 27870 | 2.74744819 |               | p<0.001 (chisq=22.5563050016568) |
| 682 | 28094 | 2.62937543 |               | p<0.01 (chisq=6.94749614551515)  |
